# Supplementary material
Source: Springer Nature journal article supplement (https://www.springermedizin.de/resource/supplementary/12879_2006_423_MOESM3_ESM.pdf/9448636)

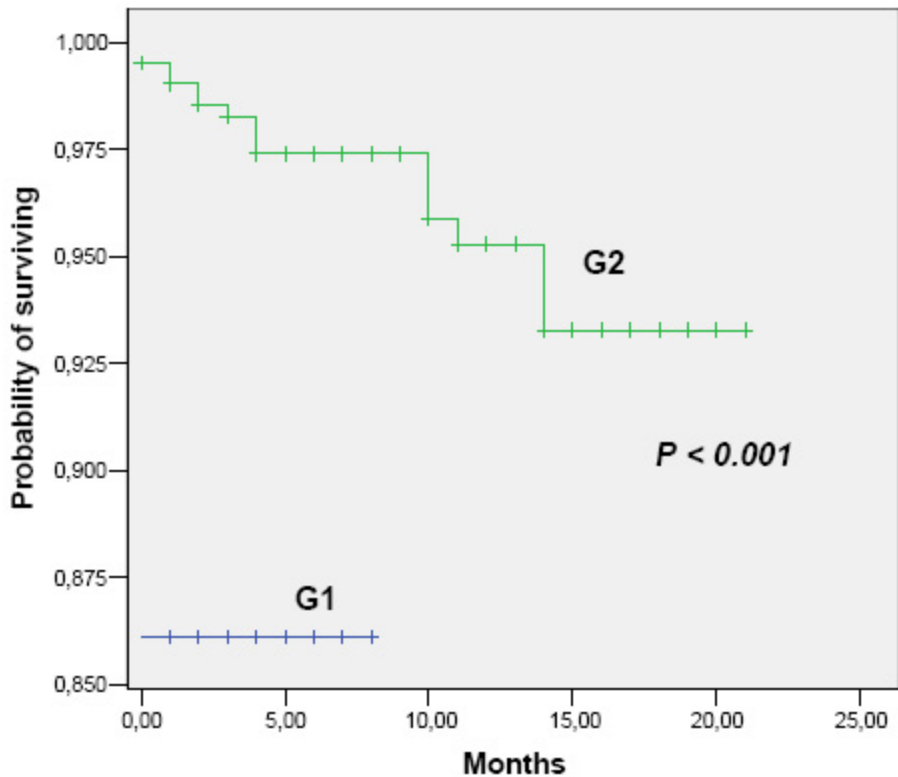

G1:  $\geq 50$  years G2: 13 – 40 years

Supplement: MOESM3 [file 9448636]
